# Supplementary material
Source: publisher figshare collection journal article supplement (https://tandf.figshare.com/ndownloader/files/14758448)
Supplement: Supplementary file [file 14758448]

## Supplementary data

Table 2. Relative survival rates (and confidence intervals) for different indications for 1st-time reoperation at the time of surgery at different follow-up times

|                         | Relative survival rate (CI) at |                  |                  |                  |
|-------------------------|--------------------------------|------------------|------------------|------------------|
|                         | 1 year                         | 5 years          | 10 years         | 15 years         |
| Aseptic loosening       | 1.01 (1.01–1.01)               | 1.04 (1.02–1.06) | 0.96 (0.89–1.03) | 0.82 (0.64–1.06) |
| Dislocation             | 0.98 (0.97–0.99)               | 0.88 (0.85–0.91) | 0.69 (0.61–0.79) | 0.53 (0.37–0.75) |
| Periprosthetic fracture | 0.93 (0.91–0.94)               | 0.80 (0.76–0.85) | 0.56 (0.44–0.71) | 0.38 (0.24–0.61) |
| Infection               | 0.98 (0.97–0.99)               | 0.93 (0.90–0.96) | 0.83 (0.68–1.00) | 0.56 (0.37–0.84) |
| Other                   | 1.00 (0.99–1.01)               | 1.01 (0.99–1.04) | 0.95 (0.87–1.03) | 0.88 (0.70–1.09) |

Table 3. Relative survival (and confidence intervals) for different indications at 2nd-time reoperation at different follow-up times

|                         | Relative survival rate (CI) at |                  |                  |                  |
|-------------------------|--------------------------------|------------------|------------------|------------------|
|                         | 1 year                         | 5 years          | 10 years         | 15 years         |
| Aseptic loosening       | 1.01 (1.01–1.02)               | 1.01 (0.96–1.07) | 0.92 (0.59–1.45) | 0.81 (0.42–1.56) |
| Dislocation             | 0.97 (0.95–1.00)               | 0.81 (0.75–0.89) | 0.46 (0.29–0.73) | 0.22 (0.11–0.43) |
| Periprosthetic fracture | 0.95 (0.91–0.99)               | 0.83 (0.73–0.94) | 0.43 (0.18–1.04) | 0.41 (0.16–1.03) |
| Infection               | 0.96 (0.94–0.98)               | 0.86 (0.82–0.91) | 0.65 (0.43–0.99) | 0.73 (0.46–1.15) |
| Other                   | 0.98 (0.97–1.00)               | 0.97 (0.93–1.01) | 0.94 (0.75–1.17) | 0.43 (0.19–0.99) |

Table 4. Reasons for 1st-time reoperation versus the original diagnosis that precipitated the THR

| Original diagnosis         | Reasons for 1st-time reoperation |             |                         |           |       |         |
|----------------------------|----------------------------------|-------------|-------------------------|-----------|-------|---------|
|                            | Aseptic loosening                | Dislocation | Periprosthetic fracture | Infection | Other | Unknown |
| Primary osteoarthritis     | 2,904                            | 1,306       | 1,111                   | 1,584     | 693   | 53      |
| Childhood hip disorder     | 116                              | 44          | 29                      | 48        | 46    | 4       |
| Complication after trauma  | 154                              | 257         | 243                     | 227       | 52    | 4       |
| Femoral head necrosis      | 115                              | 68          | 60                      | 66        | 17    | 1       |
| Inflammatory joint disease | 120                              | 48          | 54                      | 63        | 20    | 4       |
| Secondary osteoarthritis   | 149                              | 59          | 77                      | 77        | 49    | 4       |

Table 5. Reasons for 2nd-time reoperations versus the reason for the 1st-time reoperation

| Reasons for 1st-time reoperation | Reasons for 2nd-time reoperation |             |                         |           |       |       |
|----------------------------------|----------------------------------|-------------|-------------------------|-----------|-------|-------|
|                                  | Aseptic loosening                | Dislocation | Periprosthetic fracture | Infection | Other | None  |
| Aseptic loosening                | 191                              | 89          | 70                      | 127       | 66    | 3,015 |
| Dislocation                      | 42                               | 286         | 30                      | 110       | 21    | 1,293 |
| Periprosthetic fracture          | 44                               | 27          | 64                      | 51        | 77    | 1,311 |
| Infection                        | 29                               | 16          | 22                      | 633       | 342   | 1,023 |
| Other                            | 40                               | 22          | 15                      | 72        | 60    | 668   |
| Unknown                          | 1                                | 0           | 1                       | 1         | 0     | 67    |
